# Supplementary material for: A novel method for correcting the effect of the lens-to-sample distance change on the signal intensity in laser-induced breakdown spectroscopy
Source: Royal Society of Chemistry journal article supplement (doi:10.1039/d3ay00280b), 2023-01-01
Supplement: d3ay00280b1.pdf [file d3ay00280b1.pdf]

Table 3. Value of  $I_d(C)/I_0(C)$  as d changes for each standard coal sample

| Sample Number | $I_d(C)/I_0(C)$ |      |      |      |      |      |      |      | Sample Number | $I_d(C)/I_0(C)$ |      |      |      |      |      |      |      |
|---------------|-----------------|------|------|------|------|------|------|------|---------------|-----------------|------|------|------|------|------|------|------|
|               | d (mm)          |      |      |      |      |      |      |      |               | d (mm)          |      |      |      |      |      |      |      |
|               | -0.5            | -1.0 | -1.5 | -2.0 | -2.5 | -3.0 | -3.5 | -4.0 |               | 0.5             | 1.0  | 1.5  | 2.0  | 2.5  | 3.0  | 3.5  | 4.0  |
| GBW111 01k    | 0.96            | 0.91 | 0.80 | 0.62 | 0.57 | 0.38 | 0.28 | 0.15 | GBW111 01k    | 0.91            | 0.89 | 0.88 | 0.77 | 0.53 | 0.40 | 0.23 | 0.19 |
| GBW111 02b    | 0.93            | 0.83 | 0.76 | 0.61 | 0.44 | 0.33 | 0.25 | 0.20 | GBW111 02b    | 0.87            | 1.05 | 0.89 | 0.73 | 0.39 | 0.27 | 0.16 | 0.11 |
| GBW111 03n    | 1.02            | 0.99 | 0.84 | 0.71 | 0.58 | 0.40 | 0.38 | 0.36 | GBW111 03n    | 0.82            | 0.74 | 0.68 | 0.66 | 0.34 | 0.16 | 0.09 | 0.12 |
| GBW111 04m    | 0.96            | 0.92 | 0.78 | 0.71 | 0.64 | 0.36 | 0.33 | 0.25 | GBW111 04m    | 0.98            | 0.92 | 0.91 | 0.52 | 0.58 | 0.25 | 0.21 | 0.11 |
| GBW111 07h    | 0.91            | 0.78 | 0.69 | 0.51 | 0.45 | 0.33 | 0.25 | 0.18 | GBW111 07h    | 0.96            | 0.91 | 0.72 | 0.63 | 0.44 | 0.27 | 0.18 | 0.13 |
| GBW111 07i    | 0.93            | 0.74 | 0.61 | 0.51 | 0.42 | 0.30 | 0.21 | 0.18 | GBW111 07i    | 0.98            | 0.92 | 0.89 | 0.74 | 0.56 | 0.35 | 0.27 | 0.20 |
| GBW111 08s    | 0.94            | 0.81 | 0.79 | 0.63 | 0.55 | 0.48 | 0.33 | 0.24 | GBW111 08s    | 0.97            | 0.80 | 0.74 | 0.66 | 0.46 | 0.29 | 0.24 | 0.15 |
| GBW111 08t    | 0.96            | 0.88 | 0.72 | 0.62 | 0.42 | 0.35 | 0.23 | 0.17 | GBW111 08t    | 0.91            | 0.80 | 0.74 | 0.74 | 0.61 | 0.49 | 0.29 | 0.18 |
| GBW111 09t    | 0.97            | 1.02 | 0.67 | 0.82 | 0.62 | 0.57 | 0.44 | 0.30 | GBW111 09t    | 0.89            | 0.81 | 0.85 | 0.77 | 0.68 | 0.34 | 0.17 | 0.15 |
| GBW111 09u    | 0.98            | 0.99 | 0.84 | 0.76 | 0.59 | 0.43 | 0.33 | 0.31 | GBW111 09u    | 0.97            | 0.85 | 0.73 | 0.77 | 0.64 | 0.52 | 0.29 | 0.15 |
| GBW111 10r    | 0.83            | 0.74 | 0.64 | 0.54 | 0.43 | 0.31 | 0.25 | 0.21 | GBW111 10r    | 0.94            | 0.87 | 0.80 | 0.69 | 0.48 | 0.35 | 0.25 | 0.19 |
| GBW111 11s    | 0.95            | 0.90 | 0.82 | 0.76 | 0.66 | 0.49 | 0.39 | 0.30 | GBW111 11s    | 0.82            | 0.90 | 0.73 | 0.55 | 0.35 | 0.24 | 0.16 | 0.13 |
| GBW111 11t    | 0.92            | 0.84 | 0.74 | 0.64 | 0.55 | 0.41 | 0.21 | 0.17 | GBW111 11t    | 0.96            | 0.83 | 0.68 | 0.59 | 0.31 | 0.21 | 0.13 | 0.14 |
| GBW111 11u    | 1.08            | 0.97 | 0.84 | 0.69 | 0.56 | 0.48 | 0.36 | 0.21 | GBW111 11u    | 0.93            | 0.80 | 0.73 | 0.61 | 0.47 | 0.27 | 0.17 | 0.15 |
| GBW111 12l    | 1.09            | 0.86 | 0.87 | 0.70 | 0.62 | 0.56 | 0.32 | 0.23 | GBW111 12l    | 0.96            | 0.87 | 0.82 | 0.74 | 0.48 | 0.27 | 0.21 | 0.13 |
| GBW111 12m    | 0.96            | 0.97 | 0.84 | 0.78 | 0.59 | 0.34 | 0.44 | 0.27 | GBW111 12m    | 0.92            | 0.75 | 0.63 | 0.52 | 0.25 | 0.09 | 0.10 | 0.12 |
| GBW111 13l    | 0.91            | 0.85 | 0.79 | 0.82 | 0.72 | 0.59 | 0.31 | 0.22 | GBW111 13l    | 0.96            | 0.85 | 0.83 | 0.61 | 0.48 | 0.32 | 0.22 | 0.16 |
| GBW111 13m    | 0.90            | 0.91 | 0.97 | 0.71 | 0.61 | 0.41 | 0.28 | 0.17 | GBW111 13m    | 0.92            | 0.90 | 0.75 | 0.63 | 0.50 | 0.28 | 0.26 | 0.16 |
| Average       | 0.96            | 0.88 | 0.78 | 0.67 | 0.56 | 0.42 | 0.31 | 0.23 | Average       | 0.93            | 0.86 | 0.78 | 0.66 | 0.48 | 0.30 | 0.20 | 0.15 |
| STDEV         | 0.06            | 0.08 | 0.09 | 0.10 | 0.09 | 0.09 | 0.07 | 0.06 | STDEV         | 0.05            | 0.07 | 0.08 | 0.09 | 0.12 | 0.10 | 0.06 | 0.03 |

Table 4. Value of  $I_d(N)/I_0(N)$  as d changes for each standard coal sample

| Sample Number | $I_d(N)/I_0(N)$ |      |      |      |      |      |      |      | Sample Number | $I_d(N)/I_0(N)$ |      |      |      |      |      |      |      |
|---------------|-----------------|------|------|------|------|------|------|------|---------------|-----------------|------|------|------|------|------|------|------|
|               | d (mm)          |      |      |      |      |      |      |      |               | d (mm)          |      |      |      |      |      |      |      |
|               | -0.5            | -1.0 | -1.5 | -2.0 | -2.5 | -3.0 | -3.5 | -4.0 |               | 0.5             | 1.0  | 1.5  | 2.0  | 2.5  | 3.0  | 3.5  | 4.0  |
| GBW111 01k    | 0.92            | 0.72 | 0.67 | 0.59 | 0.47 | 0.45 | 0.38 | 0.36 | GBW111 01k    | 0.91            | 0.88 | 0.87 | 0.62 | 0.51 | 0.32 | 0.29 | 0.19 |
| GBW111 02b    | 0.86            | 0.75 | 0.65 | 0.56 | 0.46 | 0.43 | 0.38 | 0.32 | GBW111 02b    | 0.98            | 0.86 | 0.83 | 0.66 | 0.39 | 0.28 | 0.19 | 0.15 |
| GBW111 03n    | 0.87            | 0.79 | 0.61 | 0.49 | 0.41 | 0.31 | 0.30 | 0.25 | GBW111 03n    | 0.90            | 0.85 | 0.81 | 0.66 | 0.51 | 0.41 | 0.24 | 0.17 |
| GBW111 04m    | 0.85            | 0.81 | 0.61 | 0.50 | 0.41 | 0.40 | 0.37 | 0.34 | GBW111 04m    | 0.97            | 0.88 | 0.75 | 0.64 | 0.56 | 0.41 | 0.31 | 0.22 |
| GBW111 07h    | 0.91            | 0.79 | 0.64 | 0.58 | 0.52 | 0.43 | 0.39 | 0.30 | GBW111 07h    | 1.05            | 1.12 | 0.92 | 0.80 | 0.47 | 0.36 | 0.26 | 0.22 |
| GBW111 07i    | 0.86            | 0.69 | 0.59 | 0.51 | 0.45 | 0.42 | 0.28 | 0.26 | GBW111 07i    | 0.89            | 0.88 | 0.84 | 0.80 | 0.57 | 0.46 | 0.39 | 0.24 |
| GBW111 08s    | 0.94            | 0.81 | 0.64 | 0.54 | 0.45 | 0.40 | 0.32 | 0.25 | GBW111 08s    | 0.85            | 0.88 | 0.91 | 0.73 | 0.48 | 0.34 | 0.21 | 0.17 |
| GBW111 08t    | 0.91            | 0.74 | 0.66 | 0.54 | 0.43 | 0.36 | 0.30 | 0.24 | GBW111 08t    | 0.96            | 0.92 | 0.79 | 0.76 | 0.55 | 0.40 | 0.27 | 0.20 |
| GBW111 09t    | 0.89            | 0.71 | 0.57 | 0.49 | 0.40 | 0.34 | 0.25 | 0.20 | GBW111 09t    | 0.90            | 0.87 | 0.77 | 0.64 | 0.52 | 0.35 | 0.29 | 0.16 |
| GBW111 09u    | 0.86            | 0.79 | 0.62 | 0.50 | 0.43 | 0.32 | 0.29 | 0.23 | GBW111 09u    | 0.90            | 0.84 | 0.80 | 0.75 | 0.60 | 0.40 | 0.27 | 0.18 |
| GBW111 10r    | 0.84            | 0.71 | 0.57 | 0.46 | 0.43 | 0.35 | 0.30 | 0.26 | GBW111 10r    | 0.97            | 0.90 | 0.77 | 0.73 | 0.65 | 0.40 | 0.22 | 0.17 |
| GBW111 11s    | 0.93            | 0.82 | 0.66 | 0.53 | 0.43 | 0.37 | 0.28 | 0.25 | GBW111 11s    | 0.93            | 0.83 | 0.67 | 0.60 | 0.49 | 0.36 | 0.31 | 0.20 |
| GBW111 11t    | 0.88            | 0.77 | 0.59 | 0.55 | 0.39 | 0.41 | 0.39 | 0.32 | GBW111 11t    | 0.95            | 0.86 | 0.85 | 0.55 | 0.42 | 0.23 | 0.19 | 0.15 |
| GBW111 11u    | 0.94            | 0.82 | 0.73 | 0.63 | 0.55 | 0.43 | 0.39 | 0.37 | GBW111 11u    | 0.96            | 0.92 | 0.87 | 0.69 | 0.45 | 0.28 | 0.21 | 0.16 |
| GBW111 12l    | 0.82            | 0.72 | 0.63 | 0.59 | 0.47 | 0.37 | 0.33 | 0.29 | GBW111 12l    | 0.91            | 0.88 | 0.69 | 0.65 | 0.39 | 0.28 | 0.22 | 0.14 |
| GBW111 12m    | 0.84            | 0.74 | 0.70 | 0.54 | 0.50 | 0.45 | 0.36 | 0.31 | GBW111 12m    | 0.91            | 0.85 | 0.80 | 0.64 | 0.43 | 0.35 | 0.31 | 0.20 |
| GBW111 13l    | 0.85            | 0.72 | 0.71 | 0.58 | 0.45 | 0.41 | 0.33 | 0.28 | GBW111 13l    | 0.90            | 0.85 | 0.84 | 0.67 | 0.50 | 0.34 | 0.26 | 0.20 |
| GBW111 13m    | 0.78            | 0.68 | 0.61 | 0.51 | 0.41 | 0.36 | 0.31 | 0.29 | GBW111 13m    | 0.96            | 0.90 | 0.75 | 0.65 | 0.47 | 0.29 | 0.22 | 0.17 |
| Average       | 0.87            | 0.75 | 0.64 | 0.54 | 0.45 | 0.39 | 0.33 | 0.28 | Average       | 0.93            | 0.89 | 0.81 | 0.68 | 0.50 | 0.35 | 0.26 | 0.18 |
| STDEV         | 0.04            | 0.05 | 0.05 | 0.04 | 0.04 | 0.04 | 0.05 | 0.05 | STDEV         | 0.04            | 0.06 | 0.07 | 0.07 | 0.07 | 0.06 | 0.05 | 0.03 |

Table 5. Value of  $I_d(O)/I_0(O)$  as d changes for each standard coal sample

| Sample Number | $I_d(O)/I_0(O)$ |      |      |      |      |      |      |      | Sample Number | $I_d(O)/I_0(O)$ |      |      |      |      |      |      |      |
|---------------|-----------------|------|------|------|------|------|------|------|---------------|-----------------|------|------|------|------|------|------|------|
|               | d (mm)          |      |      |      |      |      |      |      |               | d (mm)          |      |      |      |      |      |      |      |
|               | -0.5            | -1.0 | -1.5 | -2.0 | -2.5 | -3.0 | -3.5 | -4.0 |               | 0.5             | 1.0  | 1.5  | 2.0  | 2.5  | 3.0  | 3.5  | 4.0  |
| GBW111 01k    | 0.83            | 0.67 | 0.60 | 0.48 | 0.34 | 0.29 | 0.22 | 0.20 | GBW111 01k    | 0.90            | 0.86 | 0.79 | 0.64 | 0.42 | 0.25 | 0.21 | 0.13 |
| GBW111 02b    | 0.90            | 0.74 | 0.65 | 0.51 | 0.38 | 0.30 | 0.25 | 0.20 | GBW111 02b    | 0.95            | 0.81 | 0.82 | 0.65 | 0.35 | 0.22 | 0.13 | 0.10 |
| GBW111 03n    | 0.92            | 0.71 | 0.64 | 0.43 | 0.34 | 0.25 | 0.19 | 0.14 | GBW111 03n    | 0.92            | 0.86 | 0.85 | 0.58 | 0.39 | 0.28 | 0.15 | 0.10 |
| GBW111 04m    | 0.86            | 0.76 | 0.60 | 0.43 | 0.34 | 0.27 | 0.24 | 0.23 | GBW111 04m    | 0.98            | 0.95 | 0.70 | 0.62 | 0.46 | 0.34 | 0.21 | 0.15 |
| GBW111 07h    | 0.92            | 0.72 | 0.53 | 0.46 | 0.37 | 0.27 | 0.24 | 0.17 | GBW111 07h    | 0.98            | 0.96 | 0.80 | 0.70 | 0.44 | 0.23 | 0.17 | 0.14 |
| GBW111 07i    | 0.83            | 0.65 | 0.51 | 0.42 | 0.31 | 0.27 | 0.17 | 0.16 | GBW111 07i    | 0.93            | 0.91 | 0.71 | 0.67 | 0.58 | 0.42 | 0.25 | 0.20 |
| GBW111 08s    | 0.92            | 0.73 | 0.54 | 0.44 | 0.36 | 0.33 | 0.21 | 0.16 | GBW111 08s    | 0.98            | 0.93 | 0.86 | 0.75 | 0.42 | 0.30 | 0.18 | 0.14 |
| GBW111 08t    | 0.94            | 0.74 | 0.63 | 0.43 | 0.36 | 0.26 | 0.20 | 0.17 | GBW111 08t    | 0.97            | 0.93 | 0.87 | 0.63 | 0.58 | 0.40 | 0.24 | 0.17 |
| GBW111 09t    | 0.86            | 0.69 | 0.53 | 0.44 | 0.35 | 0.28 | 0.20 | 0.15 | GBW111 09t    | 0.96            | 0.93 | 0.86 | 0.63 | 0.48 | 0.33 | 0.21 | 0.14 |
| GBW111 09u    | 0.86            | 0.77 | 0.61 | 0.45 | 0.36 | 0.26 | 0.18 | 0.15 | GBW111 09u    | 0.90            | 0.86 | 0.75 | 0.73 | 0.50 | 0.34 | 0.22 | 0.13 |
| GBW111 10r    | 0.80            | 0.64 | 0.54 | 0.39 | 0.35 | 0.27 | 0.22 | 0.17 | GBW111 10r    | 0.93            | 0.93 | 0.77 | 0.73 | 0.60 | 0.38 | 0.17 | 0.15 |
| GBW111 11s    | 0.90            | 0.78 | 0.67 | 0.50 | 0.39 | 0.30 | 0.23 | 0.18 | GBW111 11s    | 0.95            | 0.82 | 0.75 | 0.56 | 0.46 | 0.27 | 0.24 | 0.20 |
| GBW111 11t    | 0.77            | 0.73 | 0.52 | 0.46 | 0.33 | 0.31 | 0.24 | 0.17 | GBW111 11t    | 0.92            | 0.84 | 0.82 | 0.56 | 0.34 | 0.17 | 0.13 | 0.11 |
| GBW111 11u    | 0.90            | 0.73 | 0.65 | 0.48 | 0.43 | 0.32 | 0.27 | 0.23 | GBW111 11u    | 0.99            | 0.89 | 0.84 | 0.69 | 0.44 | 0.23 | 0.15 | 0.11 |
| GBW111 12l    | 0.86            | 0.64 | 0.55 | 0.46 | 0.37 | 0.28 | 0.21 | 0.20 | GBW111 12l    | 0.92            | 0.85 | 0.74 | 0.69 | 0.34 | 0.23 | 0.15 | 0.10 |
| GBW111 12m    | 0.82            | 0.74 | 0.64 | 0.50 | 0.35 | 0.32 | 0.36 | 0.28 | GBW111 12m    | 0.91            | 0.85 | 0.76 | 0.63 | 0.42 | 0.26 | 0.15 | 0.10 |
| GBW111 13l    | 0.80            | 0.75 | 0.62 | 0.50 | 0.40 | 0.31 | 0.23 | 0.17 | GBW111 13l    | 0.92            | 0.87 | 0.82 | 0.65 | 0.47 | 0.28 | 0.18 | 0.16 |
| GBW111 13m    | 0.85            | 0.74 | 0.57 | 0.44 | 0.38 | 0.25 | 0.20 | 0.15 | GBW111 13m    | 0.96            | 0.91 | 0.76 | 0.63 | 0.39 | 0.25 | 0.17 | 0.14 |
| Average       | 0.86            | 0.72 | 0.59 | 0.46 | 0.36 | 0.29 | 0.23 | 0.18 | Average       | 0.94            | 0.89 | 0.79 | 0.65 | 0.45 | 0.29 | 0.19 | 0.14 |
| STDEV         | 0.05            | 0.04 | 0.05 | 0.03 | 0.03 | 0.03 | 0.04 | 0.04 | STDEV         | 0.03            | 0.05 | 0.05 | 0.06 | 0.08 | 0.07 | 0.04 | 0.03 |
